# Supplementary material for: Active acoustic interference elicits echolocation changes in heterospecific bats
Source: Oxford University Press journal article supplement (doi:10.1242/jeb.176511), 2018-01-01
Supplement: jeb176511supp.pdf [file jeb176511supp.pdf]

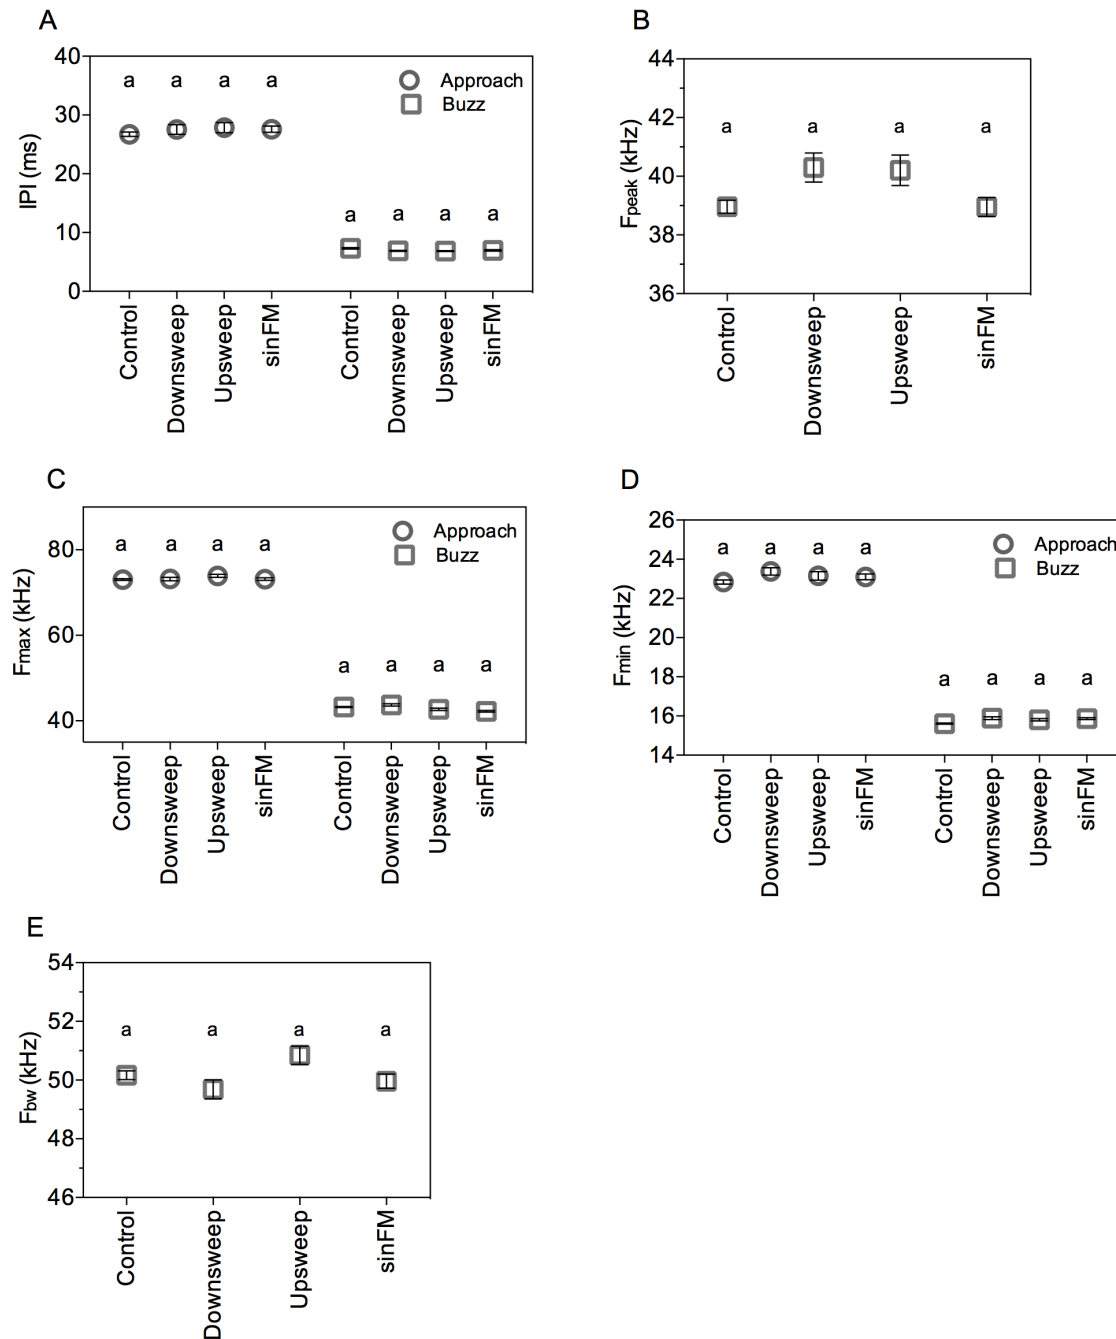

**Figure S1** All measured parameters that were determined to have non-significant changes. (A) The interpulse interval (IPI) did not change among stimuli for either the approach or buzz phase. (B)  $F_{peak}$  of the approach phase showed no statistical differences.  $F_{max}$  (C) and  $F_{min}$  (D) also showed no differences, however, the approach phase does show a slight increasing trend in both of these parameters. (E) The approach bandwidth showed no significant changes among stimuli.

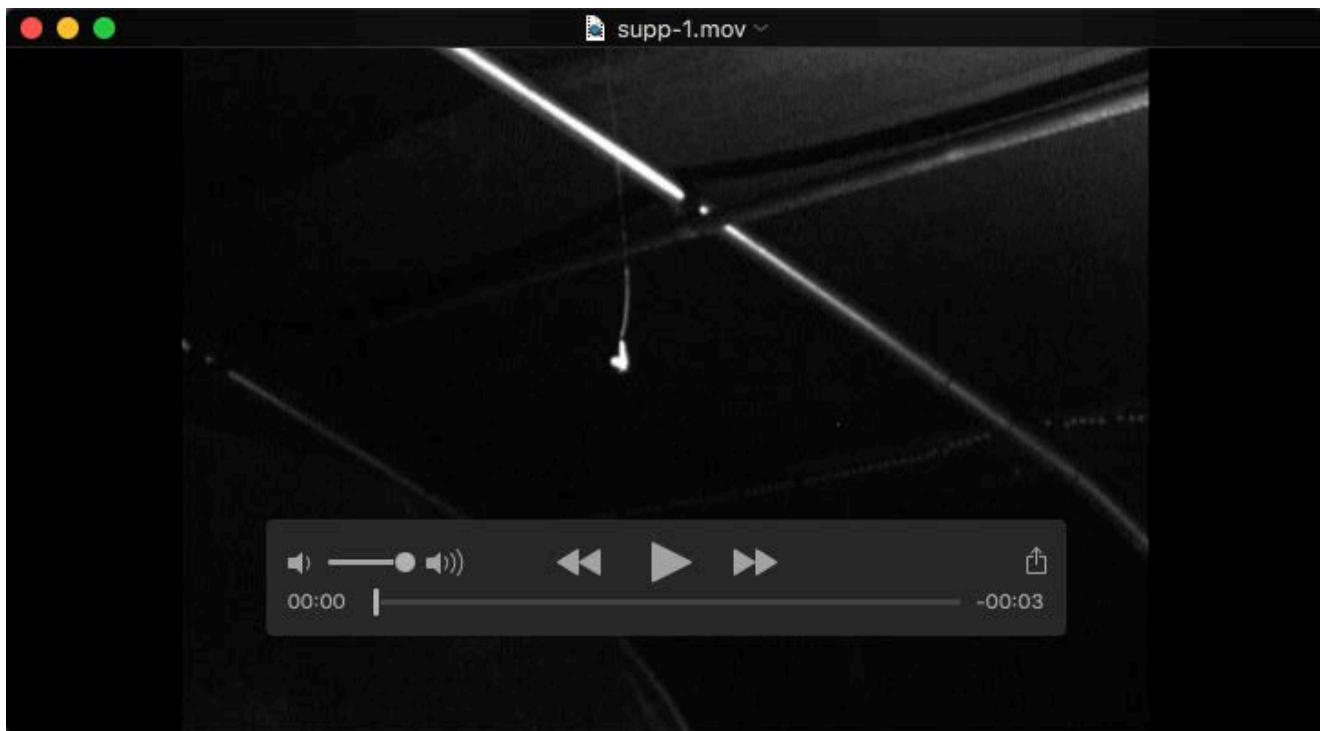

**Movie 1** Recording of a typical experimental trial depicting a typical successful attack sequence.

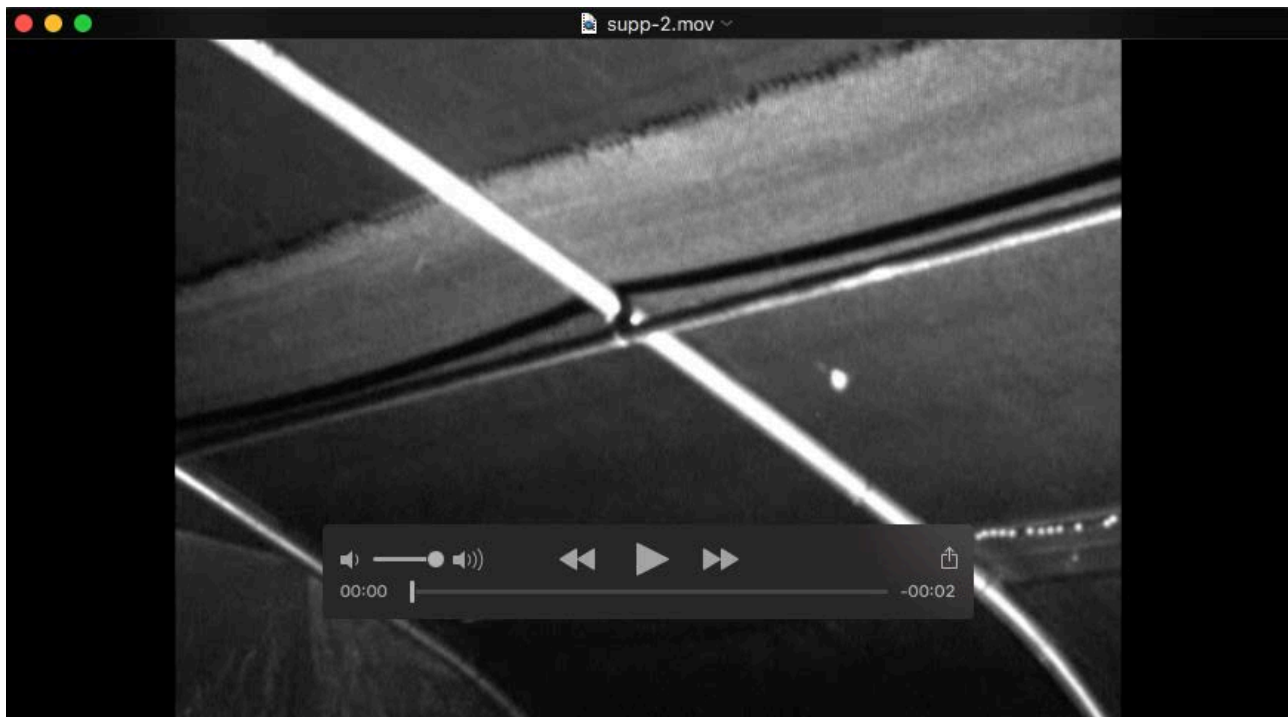

**Movie 2** Recording of a typical experimental trial depicting a typical failed attack.

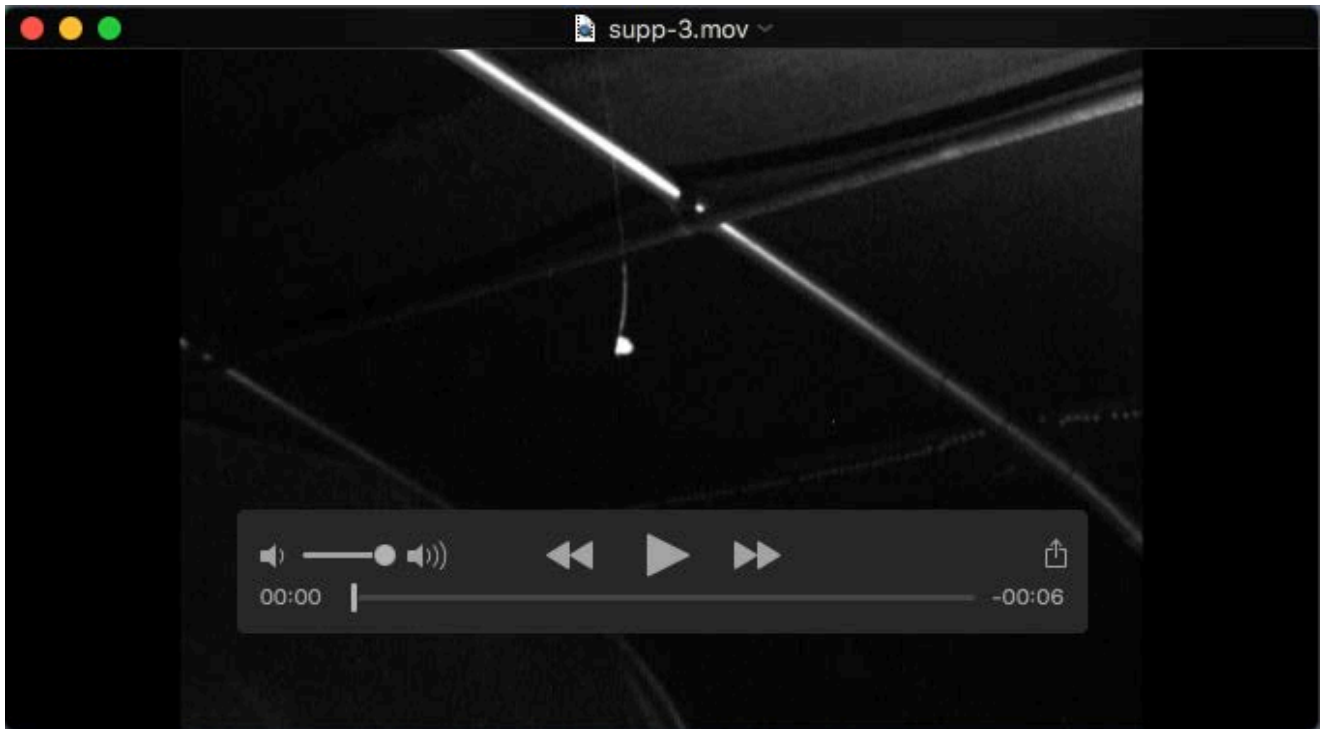

**Movie 3** Recording of a typical experimental trial in which there was no attempted capture or bats aborted the attack before making contact. In some studies, these behaviors have been documented as ‘inspection’ and ‘avoidance,’ respectively, of the prey item. Since there is no reliable way to determine if bats were deterred by the playback stimuli or chose not to initiate or continue an attack, these trials were excluded from the analysis.
